# Supplementary material for: Dipeptidyl peptidase-4 inhibitors have adverse effects for the proliferation of human T cells
Source: PubMed Central journal article supplement (PMC6160731; doi:10.3164/jcbn.17-64), 2018-04-03
Supplement: jcbn17-64sf01.pdf [file jcbn17-64sf01.pdf]

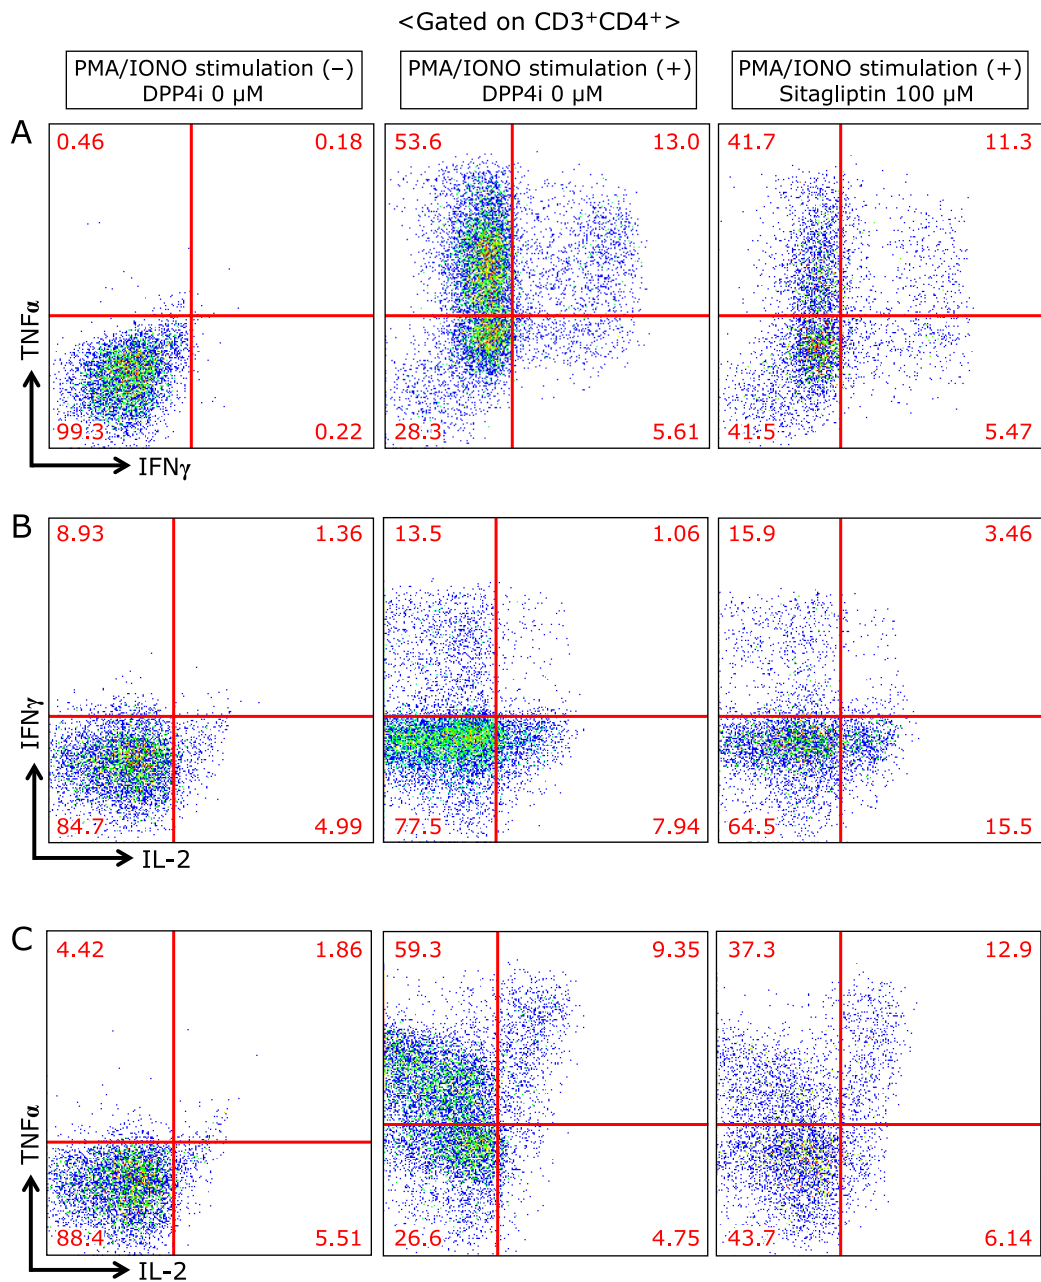

**Supplemental Fig. 1.** No harmful effect for the cytokine production of CD4<sup>+</sup> T cell by DPP4i. To investigate whether DPP4i inhibited the T cell cytokine production, we performed cytokine assays, using PMA and IONO to stimulate peripheral blood mononuclear cells. Representative pseudo color dot plots IFN $\gamma$  and TNF $\alpha$  producing cells (A), IL2 and IFN $\gamma$  producing cells (B) and IL2 and TNF $\alpha$  producing cells (C) are shown. Numbers indicate the proportion of quadruple fractions.
