# Supplementary material for: Dipeptidyl peptidase-4 inhibitors have adverse effects for the proliferation of human T cells
Source: PubMed Central journal article supplement (PMC6160731; doi:10.3164/jcbn.17-64), 2018-04-03
Supplement: jcbn17-64sf02.pdf [file jcbn17-64sf02.pdf]

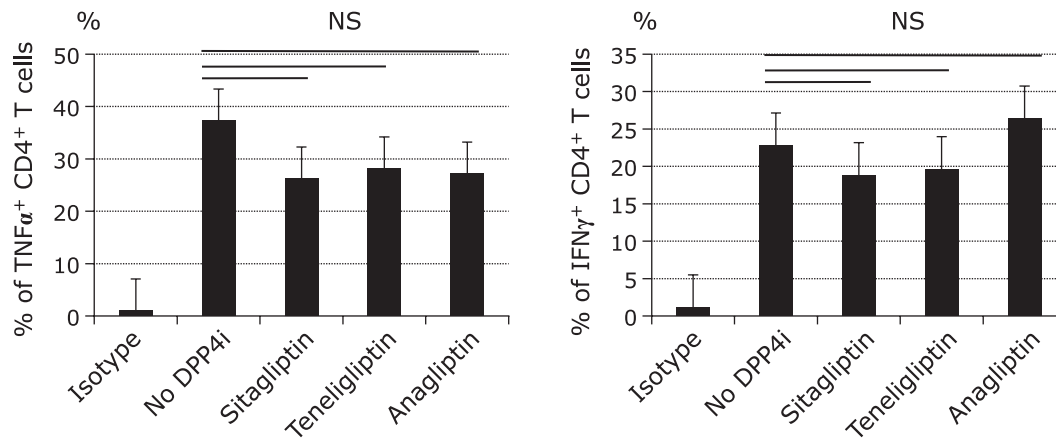

**Supplemental Fig. 2.** The class effect of cytokine assay. The bar graphs show the % of TNF $\alpha$  and IFN $\gamma$  producing cells stimulated by PMA and IONO with or without each DPP4i (sitagliptin 100  $\mu$ M, tenueligliptin 1  $\mu$ M, and anagliptin 1  $\mu$ M). The data is expressed as mean  $\pm$  SD. The experiments were repeated two times. The rate of TNF $\alpha$  and IFN $\gamma$  producing compared with the control (stimulated by PMA and IONO without DPP4i) is assessed by paired *t* test. NS indicates not significant.
